# Supplementary material for: Long-Term Follow-Up and Predictors of Functional Outcome after Surgery for Spinal Meningiomas: A Population-Based Cohort Study
Source: MDPI journal article supplement (doi:10.3390/cancers13133244), 2021-06-29
Supplement: s1 [file s1]

# Long-Term Follow-Up and Predictors of Functional Outcome after Surgery for Spinal Meningiomas: A Population-Based Cohort Study

Jenny Pettersson-Segerlind, Alexander Fletcher-Sandersjö, Charles Tatter, Gustav Burström, Oscar Persson, Petter Förander, Tiit Mathiesen, Jiri Bartek, Jr., Erik Edström and Adrian Elmi-Terander

**Table S1.** Previous studies reporting outcome following spinal meningioma surgery in the elderly.

| Reference | Study Design  | Definition of Elderly | Elderly Patients                | Non-Elderly Control Group | Results                                                                                                                                                                                                     |
|-----------|---------------|-----------------------|---------------------------------|---------------------------|-------------------------------------------------------------------------------------------------------------------------------------------------------------------------------------------------------------|
| Engel     | Retrospective | ≥70 years             | 44                              | 85                        | All patients improved in mMCs, KPS and mCSS. Surgical complication rates were similar in the elderly non-elderly (6.8 vs. 5.9 %), but systemic complications were more common in the elderly (6.8 vs. 0 %). |
| Sacko     | Retrospective | ≥70 years             | 102 with paraplegia/paraparesis | N/A                       | 91% had improved in their paraplegia or severe paraparesis at 1-year follow-up, of whom 48% recovered completely. 9% experienced a postoperative complication.                                              |
| Morandi   | Retrospective | ≥70 years             | 30                              | N/A                       | 100% had improved neurologically at 1-year follow-up. 1 patient (3%) experienced a postoperative complication.                                                                                              |

Abbreviations: KPS = Karnofsky Performance Status, mCSS = modified Clinical Scoring System, mMCs = modified McCormick scale.

**Table S2.** Univariable logistic regression predicting postoperative improvement in mMCs in the non-elderly cohort.

| Variable                      | mMCs improved ( <i>n</i> = 38) | mMCs not improved ( <i>n</i> = 45) | <i>p</i> -value  |
|-------------------------------|--------------------------------|------------------------------------|------------------|
| Time to surgery (months)      | 0.5 (0.03–10)                  | 5.0 (0.03–30)                      | <b>&lt;0.001</b> |
| Tumor area (cm <sup>2</sup> ) | 1.6 (0.2–4.5)                  | 1.2 (0.3–2.6)                      | <b>0.014</b>     |
| Spinal cord compression (%)   | 76 (12–89)                     | 56 (17–87)                         | <b>0.002</b>     |

Data presented as count (proportion). Bold text in the *p* value column indicates a statistically significant correlation (*p* < 0.05). Abbreviations: mMCs = modified McCormick scale.

**Table S3.** Univariable logistic regression predicting postoperative improvement in mMCs in the elderly cohort.

| Variable                      | mMCs improved ( <i>n</i> = 23) | mMCs not improved ( <i>n</i> = 23) | <i>p</i> -value |
|-------------------------------|--------------------------------|------------------------------------|-----------------|
| Time to surgery (months)      | 0.6 (0.03–36)                  | 0.5 (0.03–35)                      | 0.533           |
| Tumor area (cm <sup>2</sup> ) | 1.5 (0.7–2.2)                  | 1.4 (0.4–3.1)                      | 0.839           |
| Spinal cord compression (%)   | 72 (44–89)                     | 66 (20–86)                         | 0.176           |

Data presented as count (proportion). Abbreviations: mMCs = modified McCormick scale.
